# Supplementary material for: Cped1 promotes chicken SSCs formation with the aid of histone acetylation and transcription factor Sox2
Source: Oxford University Press journal article supplement (doi:10.1042/bsr20180707), 2018-07-23

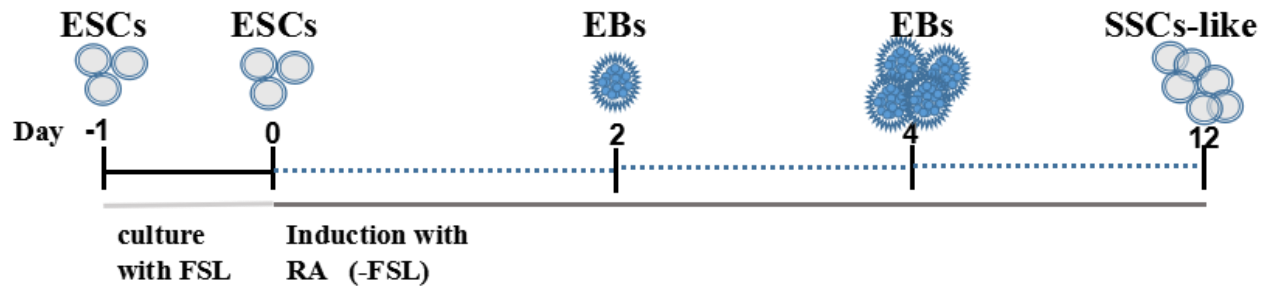

Supplement: bsr20180707_supp1.pdf [file bsr20180707_supp1.pdf]
